# Supplementary material for: The Randomized, Multicenter, Open-Label, Controlled POLBOS 3 Trial Comparing Regular Drug-Eluting Stents and the Sirolimus-Eluting BiOSS LIM C Dedicated Coronary Bifurcation Stent: Four-Year Results
Source: MDPI journal article supplement (doi:10.3390/biomedicines12050938), 2024-04-23
Supplement: s1 [file s1]

**Supplementary Table S1. Univariable regression for MACE**

| Parameter                       | Univariable analysis  |         |
|---------------------------------|-----------------------|---------|
|                                 | HR (95% CI)           | p-value |
| BiOSS vs. DES                   | 1.018 (0.407 – 1.777) | 0.647   |
| Female vs. male                 | 0.547 (0.360 – 0.993) | 0.049*  |
| NSTEMI/UA                       | 2.680 (1.340 – 4.986) | 0.006*  |
| Diabetes type 2                 | 1.754 (0.941 – 2.015) | 0.458   |
| Prior MI                        | 2.501 (1.349 – 5.346) | 0.019*  |
| True Bifurcation                | 2.779 (1.114 – 4.751) | 0.011*  |
| Prior CABG                      | 1.231 (0.893 – 2.318) | 0.671   |
| Main vessel predilatation       | 2.020 (1.548 – 3.922) | 0.039*  |
| Final kissing balloon           | 0.601 (0.396 – 1.650) | 0.326   |
| Proximal optimization technique | 0.201 (0.108 – 0.552) | 0.001*  |
| Side branch stenting            | 1.452 (0.645 – 2.441) | 0.541   |

*DES*, drug-eluting stent; *MACE*, major cardiovascular adverse events; *NSTEMI*, non-ST elevation myocardial infarction; *UA*, unstable angina

\*statistically significant

**Supplementary Table S2. Univariable logistic regression for TLR**

| Parameter                       | Univariable analysis  |         |
|---------------------------------|-----------------------|---------|
|                                 | HR (95% CI)           | p-value |
| BiOSS vs. DES                   | 1.280 (0.630 – 2.455) | 0.325   |
| Diabetes type 2                 | 1.635 (0.887 – 2.940) | 0.183   |
| Prior MI                        | 3.221 (1.736 – 9.384) | 0.002*  |
| True bifurcation                | 2.980 (1.003 – 9.672) | 0.023*  |
| Prior CABG                      | 1.432 (0.715 – 2.113) | 0.532   |
| Main vessel predilatation       | 2.120 (1.338 – 3.322) | 0.039*  |
| Final kissing balloon           | 0.527 (0.287 – 1.018) | 0.081   |
| Proximal optimization technique | 0.291 (0.176 – 0.431) | <0.001* |
| Side branch stenting            | 1.689 (0.735 – 3.124) | 0.321   |

*CI*, confidence interval; *DES*, drug-eluting stent; *OR*, odds ratio; *TLR*, target lesion revascularization;

\*statistically significant
